# Supplementary material for: Global Profiling of the Cellular Alternative RNA Splicing Landscape during Virus-Host Interactions
Source: PLoS One. 2016 Sep 6;11(9):e0161914. doi: 10.1371/journal.pone.0161914 (PMC5012649; doi:10.1371/journal.pone.0161914)
Supplement: S1 Appendix — (PDF) [file pone.0161914.s001.pdf]

# **Supplemental Data**

## **Supplemental Tables and Figures**

### **Global Profiling of the Cellular Alternative RNA Splicing Landscape During Virus-host Interactions**

Simon Boudreault<sup>1</sup>, Camille Martenon-Brodeur<sup>1</sup>, Marie Caron<sup>1</sup>, Jean-Michel Garant<sup>1</sup>, Marie-Pier Tremblay<sup>1</sup>, Victoria E. S. Armero<sup>1</sup>, Mathieu Durand<sup>2</sup>, Elvy Lapointe<sup>2</sup>, Philippe Thibault<sup>2</sup>, Maude Tremblay-Létourneau<sup>1</sup>, Jean-Pierre Perreault<sup>1</sup>, Michelle S. Scott<sup>1</sup>, Guy Lemay<sup>3</sup>, Martin Bisailon<sup>1,\*</sup>

**Table A. RNA-sequencing data**

| <b>Sample</b> | <b>Number of bases</b> | <b>HiSeq Reads</b> |
|---------------|------------------------|--------------------|
| Mock 1        | 9 270 066 200          | 46 350 331         |
| Mock 2        | 9 400 946 800          | 47 004 734         |
| Mock 3        | 7 880 753 600          | 39 403 768         |
| Reovirus 1    | 10 499 367 400         | 52 496 837         |
| Reovirus 2    | 10 352 922 800         | 51 764 614         |
| Reovirus 3    | 8 850 997 600          | 44 254 988         |

RNA-seq was performed on uninfected (mock-infected) cells, and cells infected with reovirus (14 hours post-infection). Sequencing was done in triplicate.

**Table B. Distribution of  $\Delta$ PSI values  
in the 240 differentially spliced ASEs**

| <b><math>\Delta</math>PSI</b> | <b>Number of ASEs<br/>modified</b> |
|-------------------------------|------------------------------------|
| [-80,-70[                     | 1                                  |
| [-70,-60[                     | 0                                  |
| [-60,-50[                     | 4                                  |
| [-50,-40[                     | 4                                  |
| [-40,-30[                     | 15                                 |
| [-30,-20[                     | 35                                 |
| [-20,-10[                     | 60                                 |
| ]10,20]                       | 64                                 |
| ]20,30]                       | 39                                 |
| ]30,40]                       | 11                                 |
| ]40,50]                       | 3                                  |
| ]50,60]                       | 2                                  |
| ]60,70]                       | 2                                  |

**Table C: Sequencing results (Sanger) for splicing junctions confirmed by RT-PCR**

| Gene                                                                                                                          | ASE Form | Splicing junction | Predicted sequence                     | Sequencing results                     |
|-------------------------------------------------------------------------------------------------------------------------------|----------|-------------------|----------------------------------------|----------------------------------------|
| <i>II34</i><br>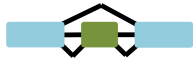<br>Exon 5 Exon 6 Exon 7      | Short    | 5-7               | CAGCGGAGCCT<br>CATGGATGTGG<br>AGATTGGC | CAGCGGAGCCT<br>CATGGATGTGG<br>AGATTGGC |
|                                                                                                                               | Long     | 5-6               | NA                                     | NA                                     |
|                                                                                                                               | Long     | 6-7               | NA                                     | NA                                     |
| <i>hnRNPA2B1</i><br>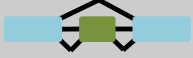<br>Exon 8 Exon 9 Exon 10 | Short    | 8-10              | GAGGAGGACCT<br>GGAGGAAATTA<br>TGGAAGTG | GAGGAGGACCT<br>GGAGGAAATTA<br>TGGAAGTG |
|                                                                                                                               | Long     | 8-9               | GAGGAGGACCT<br>GGAGGTGGCAA<br>TTTTGGAG | GAGGAGGACCT<br>GGAGGTGGCAA<br>TTTTGGAG |
|                                                                                                                               | Long     | 9-10              | ACAACTATGGA<br>GGAGGAAATTA<br>TGGAAGTG | ACAACTATGGA<br>GGAGGAAATTA<br>TGGAAGTG |

NA: Splicing junction expressed at levels too low to allow sequencing

**Table D. Bioinformatic prediction of functional changes caused by some identified ASEs**

| Gene             | Delta-PSI | Event Type                                        | Full name                                   | Predicted residue variation caused by alternative splicing modification (ΔAA) | Predicted functional consequence                                    |
|------------------|-----------|---------------------------------------------------|---------------------------------------------|-------------------------------------------------------------------------------|---------------------------------------------------------------------|
| <b>Abi1</b>      | -50.8     | exon-cassette+alternate-3p+multiple-exon-cassette | abl-interactor 1                            | -29                                                                           | Unknown                                                             |
| <b>Adar</b>      | -25.1     | alternate-5p                                      | adenosine deaminase, RNA-specific           | -26                                                                           | Unknown                                                             |
| <b>Agfg1</b>     | -27.6     | alternate-3p                                      | ArfGAP with FG repeats 1                    | -19                                                                           | Unknown                                                             |
| <b>Apol9a</b>    | 22.9      | alternate-5p                                      | apolipoprotein L 9a                         | 0                                                                             | No predicted functional change                                      |
| <b>Arhgap11a</b> | -42.9     | exon-cassette+alternate-3p+intron-retention       | Rho GTPase activating protein 11A           | -515                                                                          | NLS and RhoGAP domain loss in short isoform                         |
| <b>Arhgap11a</b> | 16.7      | exon-cassette+alternate-3p+intron-retention       | Rho GTPase activating protein 11A           | -489                                                                          | Premature stop codon introduced by intron retention in long isoform |
| <b>Asph</b>      | 13.8      | exon-cassette                                     | aspartate-beta-hydroxylase                  | 83                                                                            | Unknown                                                             |
| <b>Atat1</b>     | 13.8      | exon-cassette                                     | alpha tubulin acetyltransferase 1           | 23                                                                            | Unknown                                                             |
| <b>Atxn7l1</b>   | -22.4     | exon-cassette                                     | ataxin 7-like 1                             | -51                                                                           | Unknown                                                             |
| <b>Bnip2</b>     | -18.3     | exon-cassette                                     | BCL2/adenovirus E1B interacting protein 2   | -6                                                                            | Unknown                                                             |
| <b>Bora</b>      | 37.5      | exon-cassette                                     | bora, aurora kinase A activator             | -251                                                                          | Premature stop codon in long isoform                                |
| <b>Bptf</b>      | -22.9     | alternate-5p                                      | bromodomain PHD finger transcription factor | -281                                                                          | Unknown                                                             |
| <b>Calu</b>      | 13.3      | mutually-exclusive-exon                           | Calumenin                                   | 0                                                                             | Unknown                                                             |
| <b>Cbwd1</b>     | -23.1     | alternate-5p                                      | COBW domain containing 1                    | -121                                                                          | CobW/HypB/UreG domain truncated in short isoform                    |
| <b>Ccdc136</b>   | -10.2     | exon-cassette                                     | coiled-coil domain containing 136           | -47                                                                           | Unknown                                                             |
| <b>Ccdc15</b>    | 14.8      | alternate-5p                                      | coiled-coil domain containing 15            | 116                                                                           | Unknown                                                             |
| <b>Cdkn2aip</b>  | -18.2     | alternate-5p                                      | CDKN2A interacting protein                  | -444                                                                          | Premature stop codon inducing a NLS loss in short isoform           |
| <b>Celf1</b>     | 11.2      | alternate-3p                                      | CUGBP, Elav-like family member 1            | 1                                                                             | Unknown                                                             |

Table D

| Gene           | Delta-PSI | Event Type                                                                | Full name                                                    | Predicted residue variation caused by alternative splicing modification ( $\Delta$ AA) | Predicted functional consequence                                                          |
|----------------|-----------|---------------------------------------------------------------------------|--------------------------------------------------------------|----------------------------------------------------------------------------------------|-------------------------------------------------------------------------------------------|
| <b>Cflar</b>   | -14.8     | exon-cassette                                                             | CASP8 and FADD-like apoptosis regulator                      | -186                                                                                   | Loss of the two DED domains in short isoform                                              |
| <b>Cflar</b>   | 27.6      | exon-cassette                                                             | CASP8 and FADD-like apoptosis regulator                      | -186                                                                                   | Loss of the two DED domains in long isoform                                               |
| <b>Clip1</b>   | -18.9     | alternate-5p                                                              | CAP-GLY domain containing linker protein 1                   | -76                                                                                    | Unknown                                                                                   |
| <b>Clk4</b>    | 11.9      | exon-cassette+intron-retention                                            | CDC like kinase 4                                            | 180                                                                                    | Gain of 10 NLS and full-length Pkinase domain in long isoform                             |
| <b>Cwc22</b>   | 21.5      | alternate-5p                                                              | CWC22 spliceosome-associated protein homolog (S, cerevisiae) | -6                                                                                     | Unknown                                                                                   |
| <b>Cwc22</b>   | 19.9      | exon-cassette                                                             | CWC22 spliceosome-associated protein homolog (S, cerevisiae) | 6                                                                                      | Unknown                                                                                   |
| <b>E2f3</b>    | -20.9     | alternate-3p                                                              | E2F transcription factor 3                                   | -6                                                                                     | Additional NLS in short isoform                                                           |
| <b>Edc3</b>    | -26.5     | exon-cassette                                                             | enhancer of mRNA decapping 3 homolog (S, cerevisiae)         | -183                                                                                   | Loss of Edc3-linker domain, LSM14 domain and truncation of YjwF_N domain in short isoform |
| <b>Eif4a2</b>  | -11.4     | exon-cassette                                                             | eukaryotic translation initiation factor 4A2                 | -95                                                                                    | Truncation of DEAD box helicase domain in short isoform                                   |
| <b>Eif4h</b>   | -16.7     | exon-cassette                                                             | eukaryotic translation initiation factor 4H                  | -20                                                                                    | Unknown                                                                                   |
| <b>ErbB2ip</b> | -30.0     | exon-cassette+alternate-3p+multiple-exon-cassette+mutually-exclusive-exon | ErbB2 interacting protein                                    | -39                                                                                    | Unknown                                                                                   |
| <b>ErbB2ip</b> | 23.3      | exon-cassette+alternate-3p+multiple-exon-cassette+mutually-exclusive-exon | ErbB2 interacting protein                                    | -384                                                                                   | Premature stop codon, C-Term PDZ domain loss in short isoform                             |
| <b>Fam179b</b> | -30.2     | exon-cassette                                                             | family with sequence similarity 179, member B                | -50                                                                                    | Unknown                                                                                   |

Table D (cont'd)

| Gene             | Delta-PSI | Event Type                                        | Full name                                                | Predicted residue variation caused by alternative splicing modification ( $\Delta$ AA) | Predicted functional consequence                                                    |
|------------------|-----------|---------------------------------------------------|----------------------------------------------------------|----------------------------------------------------------------------------------------|-------------------------------------------------------------------------------------|
| <b>Ficn</b>      | 35.8      | alternate-3p                                      | folliculin                                               | -129                                                                                   | Premature stop codon, resulting in Folliculin domain truncation (174AA, C-term)     |
| <b>Foxk2</b>     | -29.7     | exon-cassette                                     | forkhead box K2                                          | -401                                                                                   | Unknown                                                                             |
| <b>G2e3</b>      | -53.0     | exon-cassette+alternate-3p+multiple-exon-cassette | G2/M-phase specific E3 ubiquitin ligase                  | 116                                                                                    | Unknown                                                                             |
| <b>Gdap2</b>     | 15.1      | alternate-3p                                      | ganglioside-induced differentiation-associated-protein 2 | 256                                                                                    | Complete CRAL and TRIO domains in long isoform                                      |
| <b>Gen1</b>      | -28.7     | exon-cassette                                     | Gen homolog 1, endonuclease (Drosophila)                 | -10                                                                                    | Earlier start codon in long isoform; Short isoform loses its XPG_N domain in N-term |
| <b>Gls</b>       | 11.3      | alternate-3p                                      | glutaminase                                              | -376                                                                                   | Unknown                                                                             |
| <b>Gpbp1</b>     | 25.6      | exon-cassette                                     | GC-rich promoter binding protein 1                       | 20                                                                                     | Unknown                                                                             |
| <b>Hmga1</b>     | 15.6      | exon-cassette+alternate-5p+intron-retention       | high mobility group AT-hook 1                            | 0                                                                                      | 5'UTR sequence change                                                               |
| <b>Hnrnpa2b1</b> | -13.6     | exon-cassette                                     | heterogeneous nuclear ribonucleoprotein A2/B1            | -40                                                                                    | Additional HnRNPA1 domain in N-term of short isoform                                |
| <b>Il34</b>      | 58.9      | exon-cassette                                     | interleukin 34                                           | -16                                                                                    | Frameshift introducing a premature stop codon in exon 8; truncation of Il34 domain  |
| <b>Ilf3</b>      | 13.2      | exon-cassette                                     | interleukin enhancer binding factor 3                    | 13                                                                                     | Unknown                                                                             |
| <b>lqce</b>      | 17.6      | exon-cassette                                     | IQ motif containing E                                    | 17                                                                                     | Unknown                                                                             |
| <b>lqce</b>      | -19.2     | exon-cassette                                     | IQ motif containing E                                    | -17                                                                                    | Unknown                                                                             |
| <b>Ivns1abp</b>  | 30.8      | exon-cassette+alternate-3p                        | influenza virus NS1A binding protein                     | -281                                                                                   | NLS and BTB domains loss in long isoform                                            |

Table D (cont'd)

| Gene           | Delta-PSI | Event Type                    | Full name                                           | Predicted residue variation caused by alternative splicing modification ( $\Delta$ AA) | Predicted functional consequence                                          |
|----------------|-----------|-------------------------------|-----------------------------------------------------|----------------------------------------------------------------------------------------|---------------------------------------------------------------------------|
| <b>Kat5</b>    | 28.7      | exon-cassette                 | K(lysine) acetyltransferase 5                       | 52                                                                                     | Long isoform have two NLS instead of only one in the short isoform        |
| <b>Kat6a</b>   | -13.6     | exon-cassette                 | K(lysine) acetyltransferase 6A                      | 130                                                                                    | Unknown                                                                   |
| <b>Kmt2e</b>   | 10.8      | exon-cassette                 | lysine (K)-specific methyltransferase 2E            | -1602                                                                                  | Loss of 6 NLS and SET and PHD domains in long isoform                     |
| <b>Lrrfip1</b> | 13.1      | exon-cassette                 | leucine rich repeat (in FLII) interacting protein 1 | 24                                                                                     | Truncation in double-stranded RNA binding protein DUF2051 in long isoform |
| <b>Macf1</b>   | -25.2     | multiple-exon-cassette        | microtubule-actin crosslinking factor 1             | -2027                                                                                  | Loss of all 9 Plectin repeat domains in short isoform                     |
| <b>Matr3</b>   | 12.3      | alternate-5p                  | matrin 3                                            | 0                                                                                      | No predicted functional change                                            |
| <b>Max</b>     | 11.3      | exon-cassette                 | Max protein                                         | -122                                                                                   | NLS and Helix-Loop-Helix domain loss in long isoform                      |
| <b>Mbnl2</b>   | 24.1      | exon-cassette                 | muscleblind-like 2                                  | 18                                                                                     | Unknown                                                                   |
| <b>Mdm2</b>    | -58.8     | exon-cassette+alternate-5p    | transformed mouse 3T3 cell double minute 2          | -197                                                                                   | SWIB domain in N-Term loss in short isoform                               |
| <b>Mon2</b>    | 38.3      | exon-cassette                 | MON2 homolog (yeast)                                | 7                                                                                      | 6 residue gap in Mon2 domain in short isoform                             |
| <b>Morn1</b>   | -16.3     | alternate-5p                  | MORN repeat containing 1                            | -245                                                                                   | Loss of 4 MORN domain out of 8 in short isoform                           |
| <b>Msh4</b>    | -38.7     | alternate-5p                  | mutS homolog 4 (E. coli)                            | 404                                                                                    | Premature stop codon in long isoform                                      |
| <b>Mtif3</b>   | 25.0      | exon-cassette+alternate-5p    | mitochondrial translational initiation factor 3     | 0                                                                                      | Unknown                                                                   |
| <b>Nabp1</b>   | 41.4      | alternate-5p+intron-retention | nucleic acid binding protein 1                      | -91                                                                                    | Unknown                                                                   |
| <b>Naip2</b>   | 21.8      | exon-cassette                 | NLR family, apoptosis inhibitory protein 2          | 56                                                                                     | Unknown                                                                   |

Table D (cont'd)

| Gene    | Delta-PSI | Event Type                     | Full name                                                        | Predicted residue variation caused by alternative splicing modification ( $\Delta$ AA) | Predicted functional consequence              |
|---------|-----------|--------------------------------|------------------------------------------------------------------|----------------------------------------------------------------------------------------|-----------------------------------------------|
| Nasp    | -16.5     | exon-cassette                  | nuclear autoantigenic sperm protein (histone-binding)            | -325                                                                                   | Unknown                                       |
| Nde1    | -16.6     | alternate-3p                   | nuclear distribution gene E homolog 1 (A nidulans)               | 27                                                                                     | Unknown                                       |
| Nek1    | 26.9      | exon-cassette                  | NIMA (never in mitosis gene a)-related expressed kinase 1        | 29                                                                                     | Unknown                                       |
| Neurl4  | -19.2     | exon-cassette                  | neuralized homolog 4 (Drosophila)                                | -22                                                                                    | Unknown                                       |
| Nfx1    | 28.3      | alternate-3p                   | nuclear transcription factor, X-box binding 1                    | -14                                                                                    | Unknown                                       |
| Odf2l   | -16.0     | exon-cassette                  | outer dense fiber of sperm tails 2-like                          | -96                                                                                    | Unknown                                       |
| Opa1    | -14.5     | exon-cassette                  | optic atrophy 1                                                  | -37                                                                                    | Unknown                                       |
| Pan3    | 17.4      | exon-cassette                  | PAN3 polyA specific ribonuclease subunit homolog (S, cerevisiae) | 258                                                                                    | Unknown                                       |
| Pcgf5   | 15.5      | exon-cassette                  | polycomb group ring finger 5                                     | 20                                                                                     | C-term RAWUL domain truncated in long isoform |
| Phactr4 | -16.8     | exon-cassette                  | phosphatase and actin regulator 4                                | -27                                                                                    | RPEL repeat domain loss in short isoform      |
| Piga    | -33.8     | alternate-5p                   | phosphatidylinositol glycan anchor biosynthesis, class A         | -316                                                                                   | PIGA domain loss in short isoform             |
| Pitpnb  | -21.8     | exon-cassette                  | phosphatidylinositol transfer protein, beta                      | -1                                                                                     | Unknown                                       |
| Pnpla7  | 69.1      | alternate-5p                   | patatin-like phospholipase domain containing 7                   | -886, -52, -454 or +380                                                                | Unknown                                       |
| Polg2   | -13.5     | alternate-5p                   | polymerase (DNA directed), gamma 2, accessory subunit            | -44                                                                                    | Unknown                                       |
| Ppfibp1 | -16.1     | exon-cassette+intron-retention | PTPRF interacting protein, binding protein 1 (liprin beta 1)     | -11                                                                                    | Unknown                                       |

Table D (cont'd)

| Gene            | Delta-PSI | Event Type                           | Full name                                                   | Predicted residue variation caused by alternative splicing modification ( $\Delta$ AA) | Predicted functional consequence                                                                         |
|-----------------|-----------|--------------------------------------|-------------------------------------------------------------|----------------------------------------------------------------------------------------|----------------------------------------------------------------------------------------------------------|
| <b>Ppp1r12a</b> | 10.2      | exon-cassette                        | protein phosphatase 1, regulatory (inhibitor) subunit 12A   | 422                                                                                    | Unknown                                                                                                  |
| <b>Pqlc1</b>    | 50.9      | exon-cassette                        | PQ loop repeat containing 1                                 | 18                                                                                     | Unknown                                                                                                  |
| <b>Prpf39</b>   | 18.5      | exon-cassette+multiple-exon-cassette | PRP39 pre-mRNA processing factor 39 homolog (yeast)         | -201, -239                                                                             | Loss of part of Tetratricopeptide-like helical domain and HAT repeats in both C- and N-term              |
| <b>Pum2</b>     | -11.2     | exon-cassette                        | pumilio RNA-binding family member 2                         | -79                                                                                    | Unknown                                                                                                  |
| <b>Ranbp3</b>   | -27.0     | exon-cassette+multiple-exon-cassette | RAN binding protein 3                                       | 331                                                                                    | NLS loss and full RanBP1 domain in long isoform                                                          |
| <b>Rfx5</b>     | 34.7      | exon-cassette+alternate-5p           | regulatory factor X, 5 (influences HLA class II expression) | 185                                                                                    | NLS gain and full-length RFX5 DNA-binding domain in long isoform                                         |
| <b>Rnf135</b>   | -31.1     | exon-cassette                        | ring finger protein 135                                     | -216                                                                                   | Zinc finger of C3HC4-type domain loss in short isoform                                                   |
| <b>Rnps1</b>    | -25.7     | exon-cassette+multiple-exon-cassette | ribonucleic acid binding protein S1                         | -23                                                                                    | Unknown                                                                                                  |
| <b>Rnps1</b>    | -14.6     | exon-cassette+multiple-exon-cassette | ribonucleic acid binding protein S1                         | -23                                                                                    | Unknown                                                                                                  |
| <b>Scaf11</b>   | -11.6     | alternate-5p                         | SR-related CTD-associated factor 11                         | -16                                                                                    | Unknown                                                                                                  |
| <b>Senp1</b>    | 22.9      | exon-cassette                        | SUMO1/sentrin specific peptidase 1                          | -142                                                                                   | Unknown                                                                                                  |
| <b>Sfswap</b>   | -24.8     | alternate-5p                         | splicing factor, suppressor of white-apricot family         | -724                                                                                   | 47 AA truncation in Alternative splicing regulator domain and 2 Surp module domain loss in short isoform |
| <b>Skil</b>     | -14.2     | alternate-5p                         | SKI-like                                                    | -35                                                                                    | Unknown                                                                                                  |

Table D (cont'd)

| Gene            | Delta-PSI | Event Type                            | Full name                                                    | Predicted residue variation caused by alternative splicing modification ( $\Delta$ AA) | Predicted functional consequence                                                                                                                |
|-----------------|-----------|---------------------------------------|--------------------------------------------------------------|----------------------------------------------------------------------------------------|-------------------------------------------------------------------------------------------------------------------------------------------------|
| <b>Slc23a2</b>  | -12.2     | alternate-3p                          | solute carrier family 23 (nucleobase transporters), member 2 | -308                                                                                   | 208 AA loss in the N-term of Xan_ur_permease domain in short isoform                                                                            |
| <b>Son</b>      | 25.7      | exon-cassette+alternate-5p            | Son DNA binding protein                                      | -2198                                                                                  | Premature stop codon in long isoform, introducing 4 NLS and G-patch, Arginine/Serine-Rich protein 1 and double-stranded RNA binding domain loss |
| <b>Spef2</b>    | 18.4      | exon-cassette                         | sperm flagellar 2                                            | 923                                                                                    | Unknown                                                                                                                                         |
| <b>Spopl</b>    | 27.8      | exon-cassette                         | speckle-type POZ protein-like                                | 56                                                                                     | Unknown                                                                                                                                         |
| <b>Stx3</b>     | 39.5      | exon-cassette+mutually-exclusive-exon | syntaxin 3                                                   | 97                                                                                     | 75 AA truncation of Syntaxin domain in long isoform                                                                                             |
| <b>Tbp</b>      | -44.3     | exon-cassette                         | TATA box binding protein                                     | -56                                                                                    | TBP domain loss and truncation of first TBP domain's end in short isoform                                                                       |
| <b>Tcf12</b>    | 30.7      | exon-cassette+intron-retention        | transcription factor 12                                      | 24                                                                                     | Unknown                                                                                                                                         |
| <b>Tmem132a</b> | 66.1      | alternate-3p                          | transmembrane protein 132A                                   | 29                                                                                     | Unknown                                                                                                                                         |
| <b>Tmem168</b>  | -32.5     | exon-cassette                         | transmembrane protein 168                                    | -384                                                                                   | Unknown                                                                                                                                         |
| <b>Tmem19</b>   | -15.0     | alternate-5p                          | transmembrane protein 19                                     | 12                                                                                     | Full lenght DUF92 integral membrane domain in long isoform                                                                                      |
| <b>Tmpo</b>     | -38.3     | exon-cassette+multiple-exon-cassette  | thymopoietin                                                 | -40                                                                                    | Unknown                                                                                                                                         |
| <b>Tmpo</b>     | -11.5     | exon-cassette+multiple-exon-cassette  | thymopoietin                                                 | -72                                                                                    | Unknown                                                                                                                                         |
| <b>Tpp2</b>     | 10.7      | exon-cassette                         | tripeptidyl peptidase II                                     | -130                                                                                   | Unknown                                                                                                                                         |
| <b>Tra2a</b>    | 21.2      | exon-cassette                         | transformer 2 alpha homolog (Drosophila)                     | 97                                                                                     | Full-length RNA recognition motif in long isoform                                                                                               |

Table D (cont'd)

| Gene                 | Delta-PSI | Event Type                                        | Full name                                              | Predicted residue variation caused by alternative splicing modification ( $\Delta$ AA) | Predicted functional consequence                                                                                                                                |
|----------------------|-----------|---------------------------------------------------|--------------------------------------------------------|----------------------------------------------------------------------------------------|-----------------------------------------------------------------------------------------------------------------------------------------------------------------|
| <b>Trappc13</b>      | -29.9     | exon-cassette                                     | trafficking protein particle complex 13                | -6                                                                                     | DUF974 domain truncation of 6 AA in short isoform                                                                                                               |
| <b>Ubp1</b>          | -21.4     | exon-cassette                                     | ubiquitin-associated protein 1                         | -61                                                                                    | Unknown                                                                                                                                                         |
| <b>Ubr3</b>          | 11.3      | alternate-3p                                      | ubiquitin protein ligase E3 component n-recogin 3      | 4                                                                                      | Unknown                                                                                                                                                         |
| <b>Upf1</b>          | -23.4     | alternate-5p                                      | UPF1 regulator of nonsense transcripts homolog (yeast) | -11                                                                                    | Unknown                                                                                                                                                         |
| <b>Wsb1</b>          | 19.9      | alternate-3p                                      | WD repeat and SOCS box-containing 1                    | -177                                                                                   | Premature stop codon in long isoform, resulting in a truncated protein containing only a WD, G-beta domain instead of 4 WD, G-beta domain and a SOCS box domain |
| <b>Xdh</b>           | -25.6     | alternate-5p                                      | xanthine dehydrogenase                                 | -599                                                                                   | NLS appearance in short isoform                                                                                                                                 |
| <b>Zfp207</b>        | -12.5     | exon-cassette                                     | zinc finger protein 207                                | -6                                                                                     | Unknown                                                                                                                                                         |
| <b>Zfp788</b>        | -32.4     | exon-cassette+alternate-3p+multiple-exon-cassette | zinc finger protein 788                                | -532                                                                                   | Unknown                                                                                                                                                         |
| <b>Zmynd11</b>       | -17.1     | exon-cassette                                     | zinc finger, MYND domain containing 11                 | -54                                                                                    | Unknown                                                                                                                                                         |
| <b>Zyx</b>           | 13.8      | exon-cassette                                     | zyxin                                                  | 31                                                                                     | Unknown                                                                                                                                                         |
| <b>1700057G04Rik</b> | -31.1     | exon-cassette                                     | RIKEN cDNA 1700057G04 gene                             | -76                                                                                    | Truncation in Scramblase domain in short isoform                                                                                                                |
| <b>2310057M21Rik</b> | -15.9     | alternate-5p                                      | RIKEN cDNA 2310057M21 gene                             | 77                                                                                     | Unknown                                                                                                                                                         |
| <b>4631405J19Rik</b> | -45.7     | alternate-3p                                      | RIKEN cDNA 4631405J19 gene                             | -100                                                                                   | Unknown                                                                                                                                                         |
| <b>4930511M06Rik</b> | -23.6     | exon-cassette                                     | RIKEN cDNA 4930511M06 gene                             | NA                                                                                     | Non-coding RNA                                                                                                                                                  |

Table D (cont'd)

Figure A. Detection of reovirus genes in infected cells by qRT-PCR.

(A) Total RNA was extracted from both uninfected and infected cells (14 h post-infection). Viral infection was confirmed by qRT-PCR using specific primers for three viral genes (M1, S1, L1). A control reaction without template (NTC: no template control) was also performed. All three viral genes were detected in the infected cells samples but were undetectable in the uninfected (mock) samples (absence of amplification or nonspecific amplification). Cq: quantification cycle.

(B) Primers used for qPCR detection.

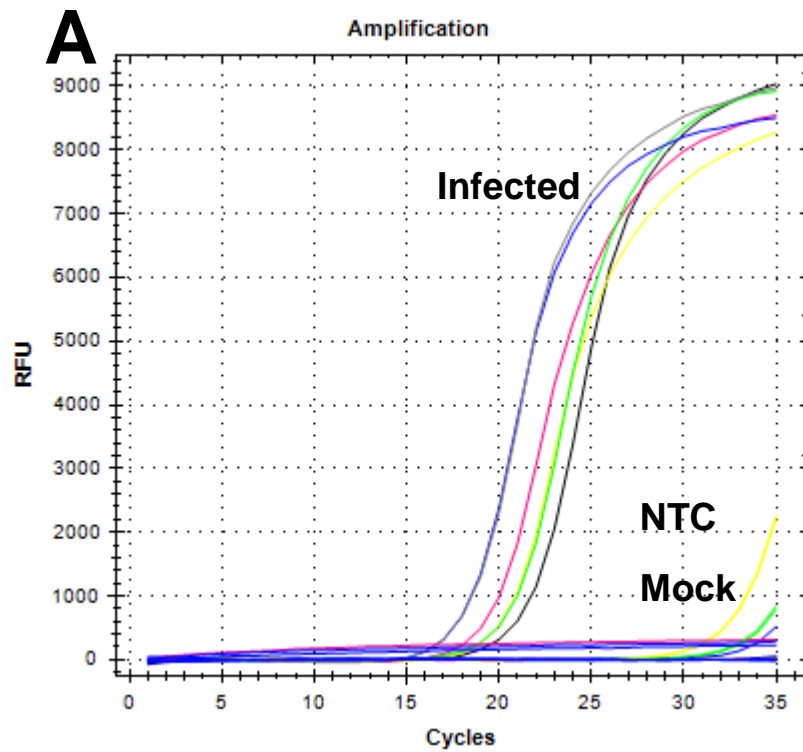

**qRT-PCR data on amplification of viral genes in uninfected (mock) and infected cells**

| Orthoreovirus Primer | Cq Mock    | Cq infected | Cq NTC     | Color  |
|----------------------|------------|-------------|------------|--------|
| L1_1                 | Undetected | 20.52       | Undetected | Black  |
| L1_2                 | Undetected | 19.22       | Undetected | Yellow |
| M1_1                 | Undetected | 18.57       | Undetected | Pink   |
| M1_2                 | Undetected | 19.68       | Undetected | Green  |
| S1_1                 | Undetected | 16.93       | Undetected | Blue   |
| S1_2                 | Undetected | 17.00       | Undetected | Gray   |

**B**

**Primers design for qRT-PCR amplification of reovirus genes**

| Name | Primer forward              | Sequence              | Primer reverse              | Sequence             |
|------|-----------------------------|-----------------------|-----------------------------|----------------------|
| L1_1 | orthoreovirus_t3d_seg_L1.F1 | GGCAAAGACGGTGTCTGGGTC | orthoreovirus_t3d_seg_L1.R1 | TGCGTCCGCTTCTGACTCCT |
| L1_2 | orthoreovirus_t3d_seg_L1.F2 | CTAGGGGTGGATCTGGCGCA  | orthoreovirus_t3d_seg_L1.R2 | TCGCTAATTGTGCCGCTGG  |
| M1_1 | orthoreovirus_t3d_seg_M1.F1 | AGCGCGCAGCCTAAATGGTT  | orthoreovirus_t3d_seg_M1.R1 | ACGTAGATGCCGGGTCTGCT |
| M1_2 | orthoreovirus_t3d_seg_M1.F2 | AGATGAGGCTTTCGTGCGGC  | orthoreovirus_t3d_seg_M1.R2 | GCATGTCACGGATCACGCCA |
| S1_1 | orthoreovirus_t3d_seg_S1.F1 | GGTCGGATGGATCCTCGCCT  | orthoreovirus_t3d_seg_S1.R1 | TCGAGTCCCTGGGTGATCCG |
| S1_2 | orthoreovirus_t3d_seg_S1.F2 | CCTCCGATCACCCAGGGAC   | orthoreovirus_t3d_seg_S1.R2 | TGTCCCACTCGAGCACCCAA |

Figure A

Figure B. Heatmap representation of gene expression of total cellular genes in both infected and uninfected (mock) cells.

RNA sequencing was done in triplicate for each condition. The map represents the number of transcripts sequences (TPM: transcripts per million) in a color-coded logarithmic scale. Blue and green indicates high levels of gene expression while yellow indicates low levels of gene expression.

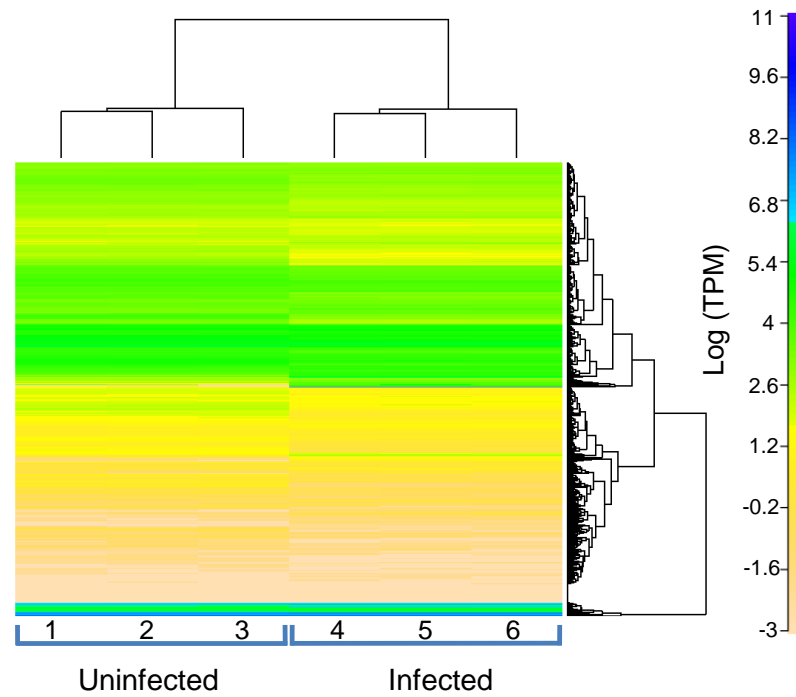

Figure B

Figure C. List of the 570 genes for which the expression was the most significantly modified following viral infection.

The list of genes is shown with the corresponding expression profile of each gene. The level of gene expression is presented on a logarithmic scale ( $\text{Log}_2$ )

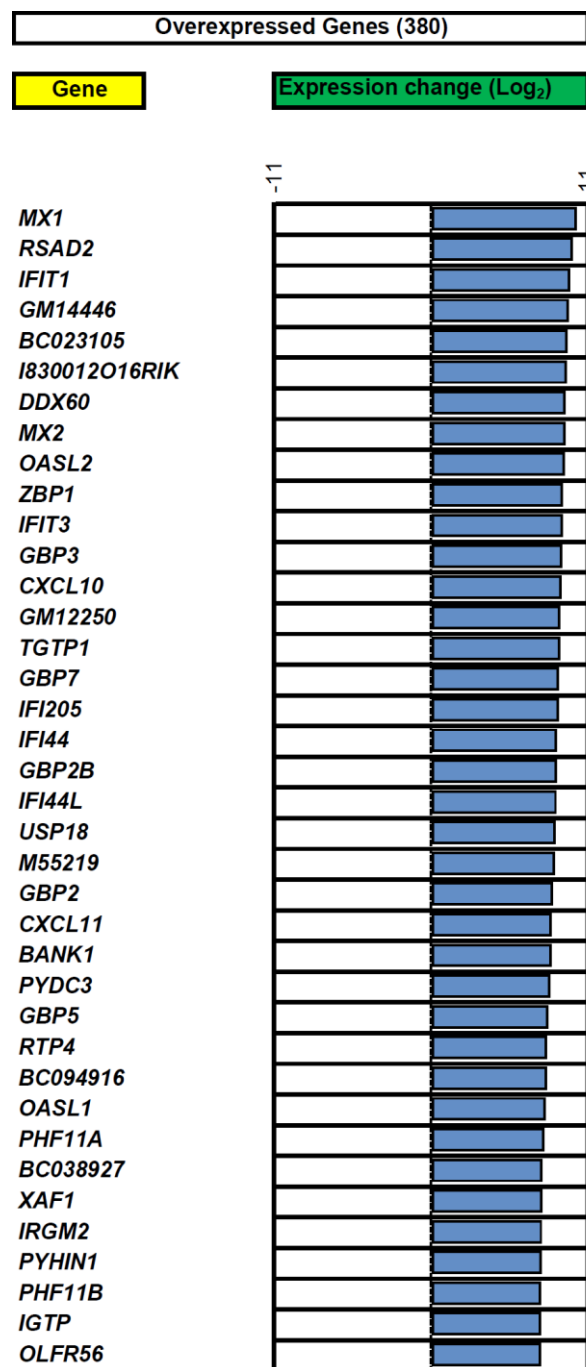

Figure C

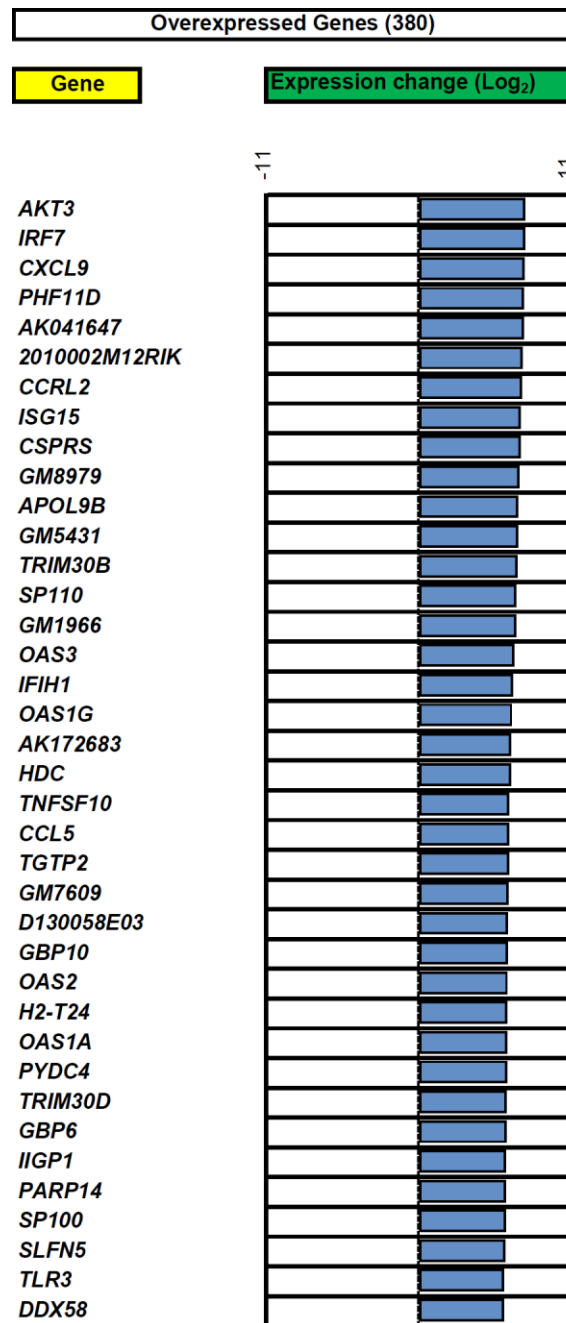

Figure C (cont'd)

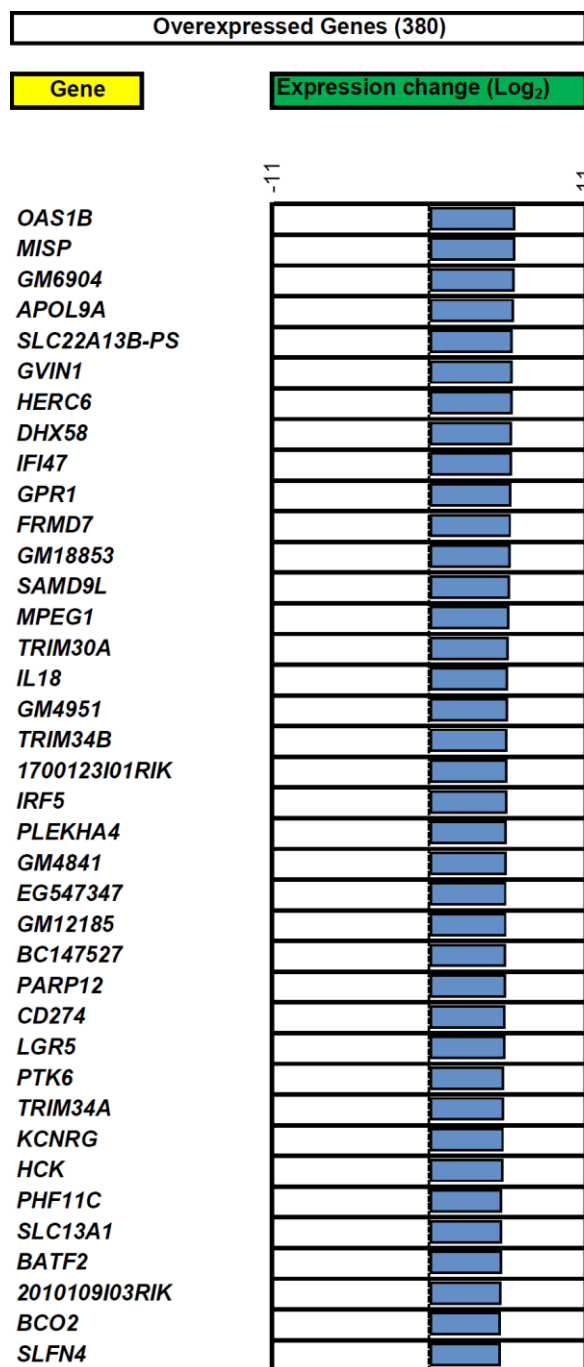

Figure C (cont'd)

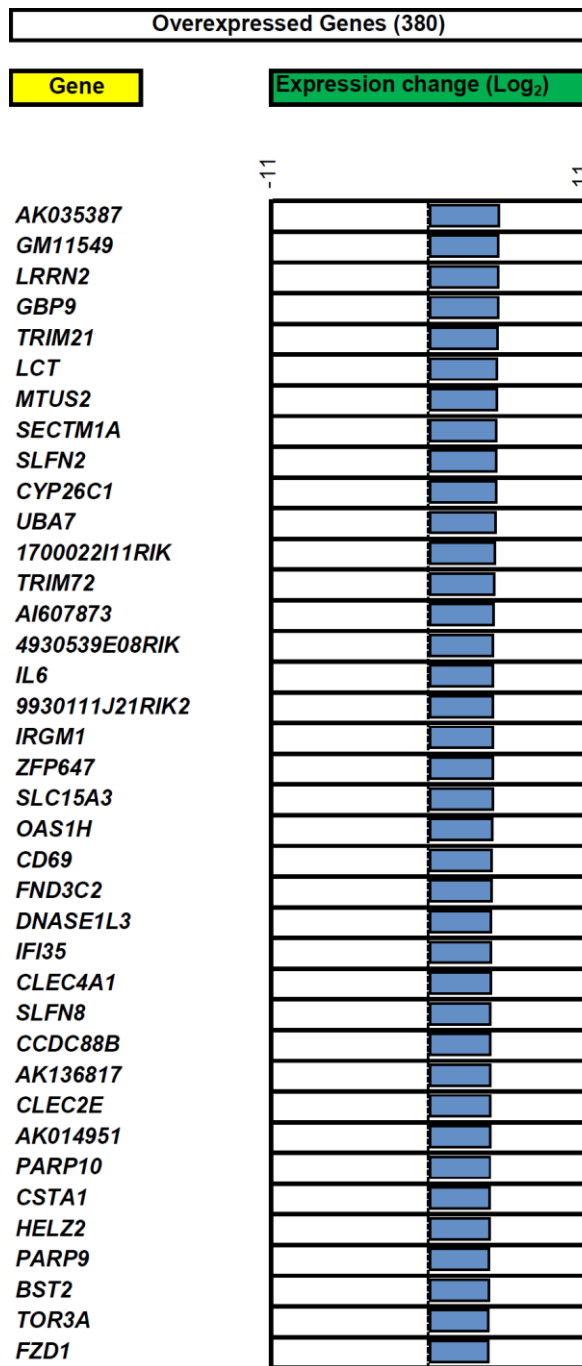

Figure C (cont'd)

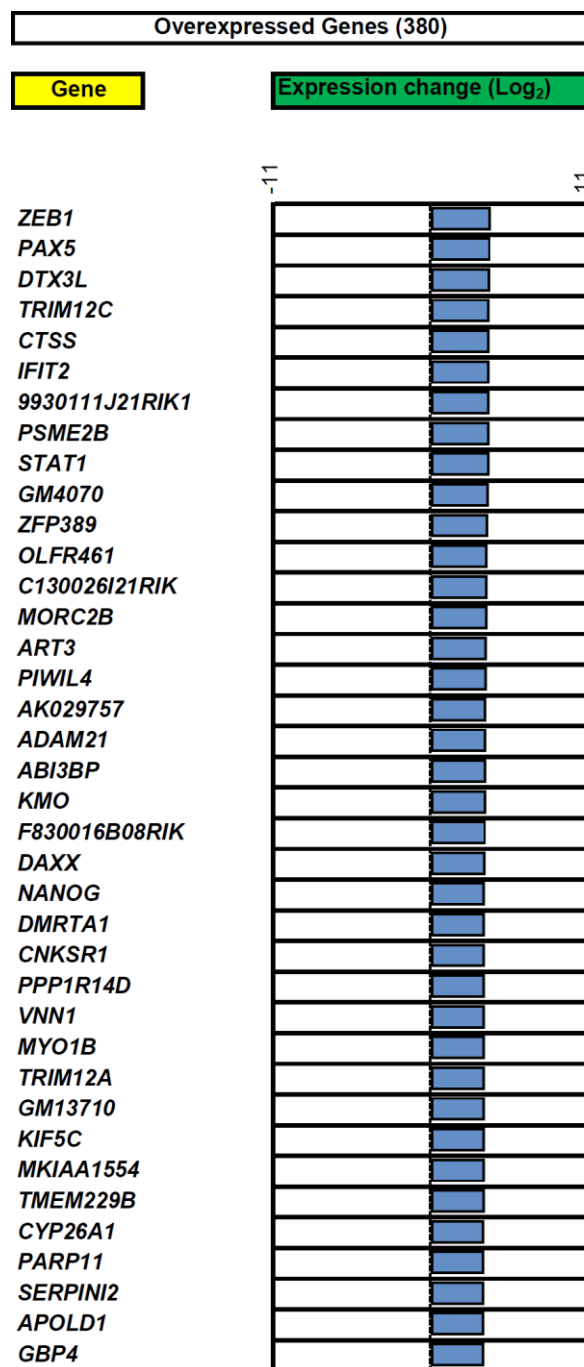

Figure C (cont'd)

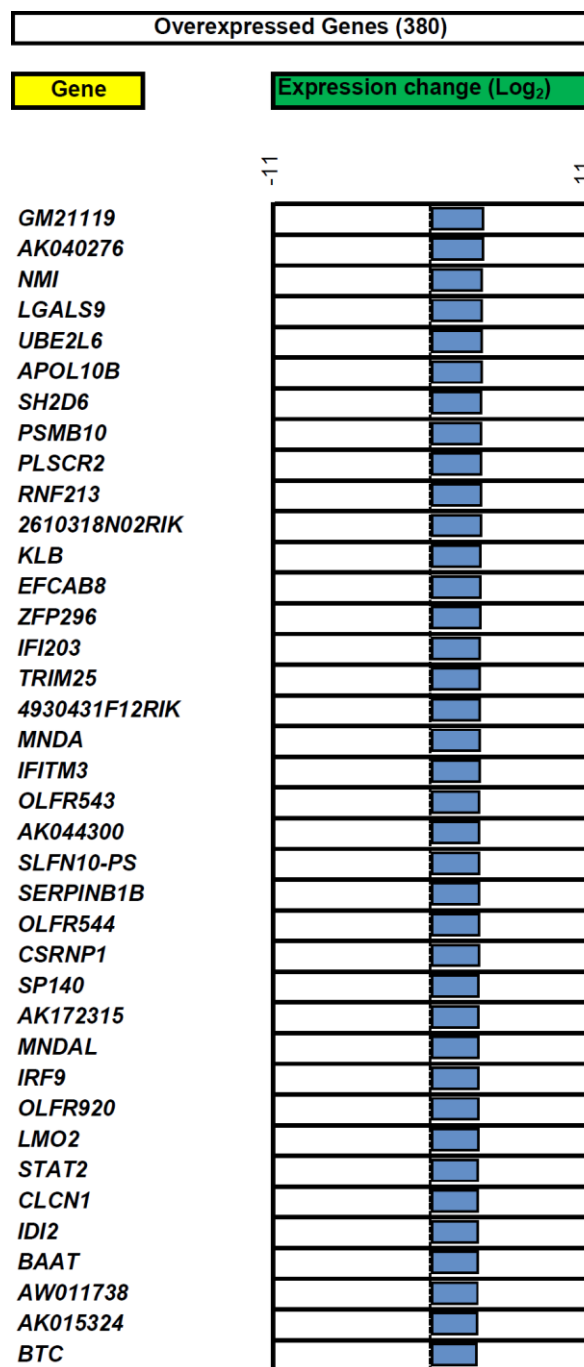

Figure C (cont'd)

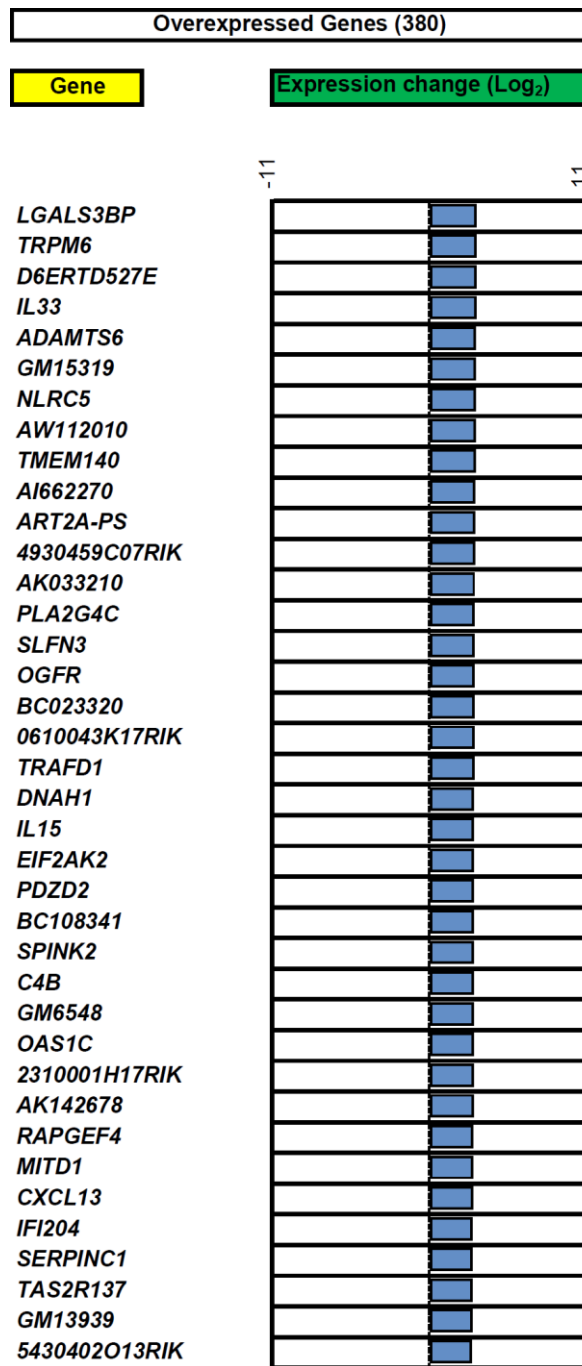

Figure C (cont'd)

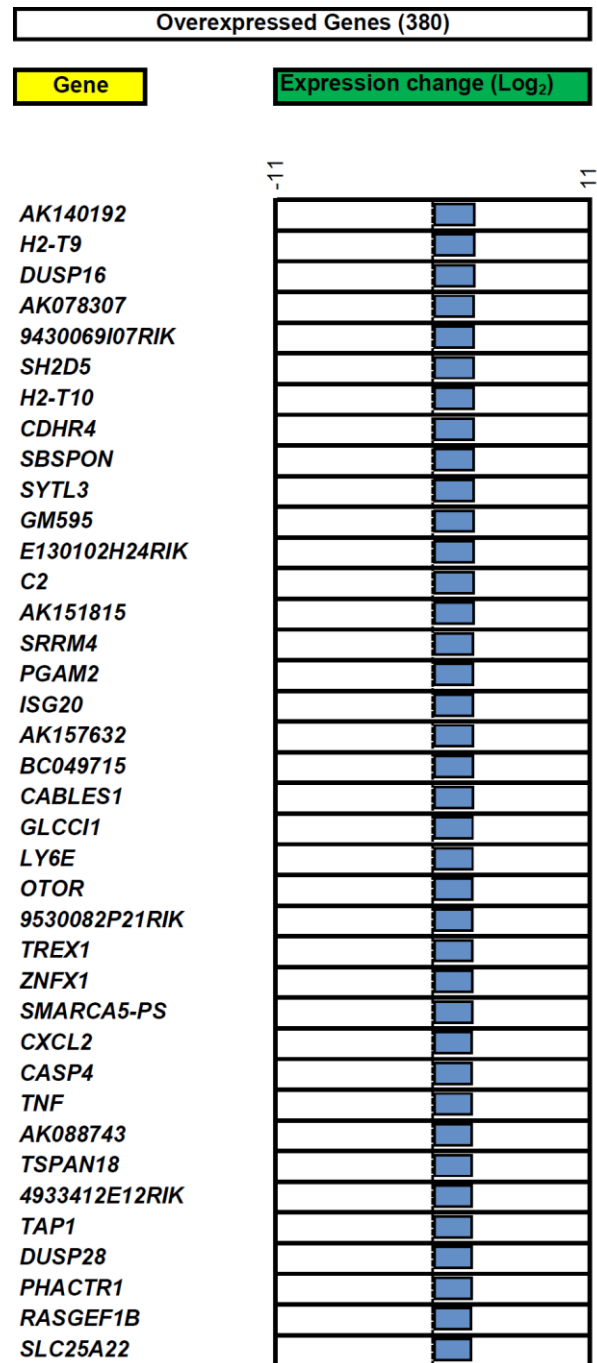

Figure C (cont'd)

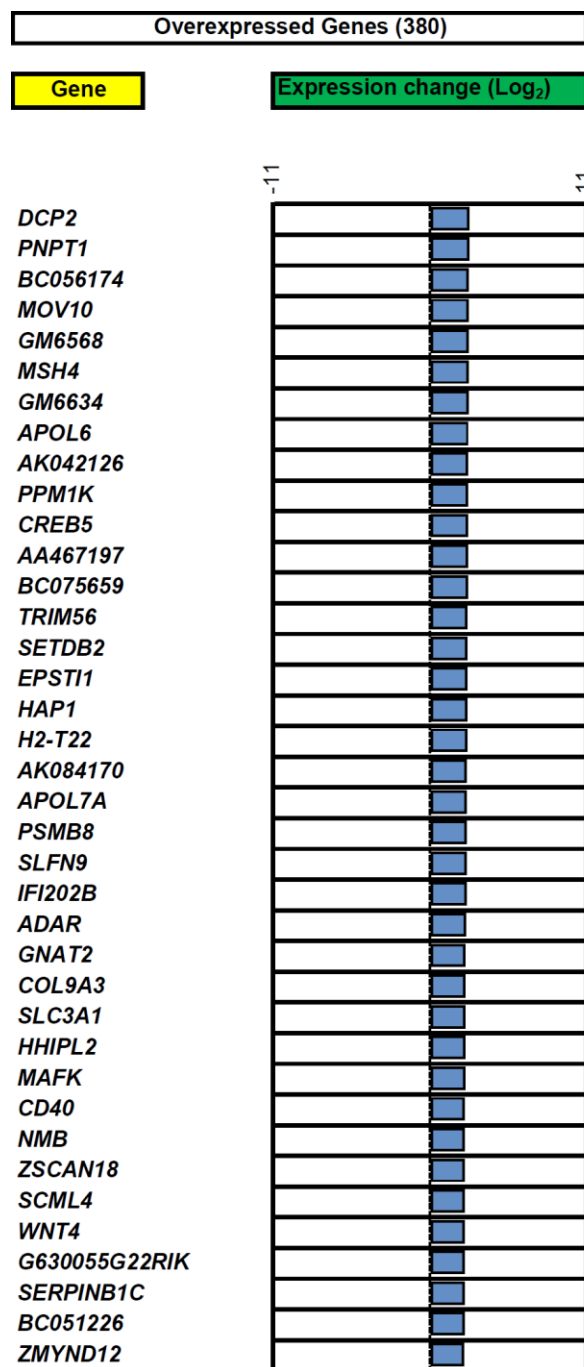

Figure C (cont'd)

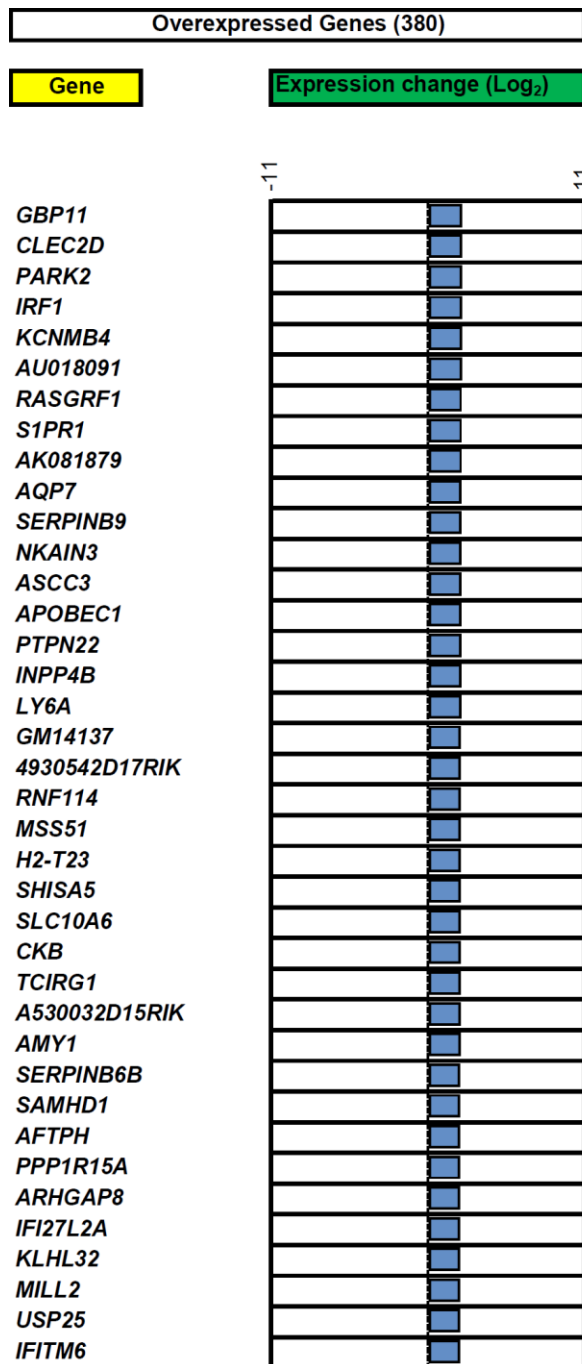

Figure C (cont'd)

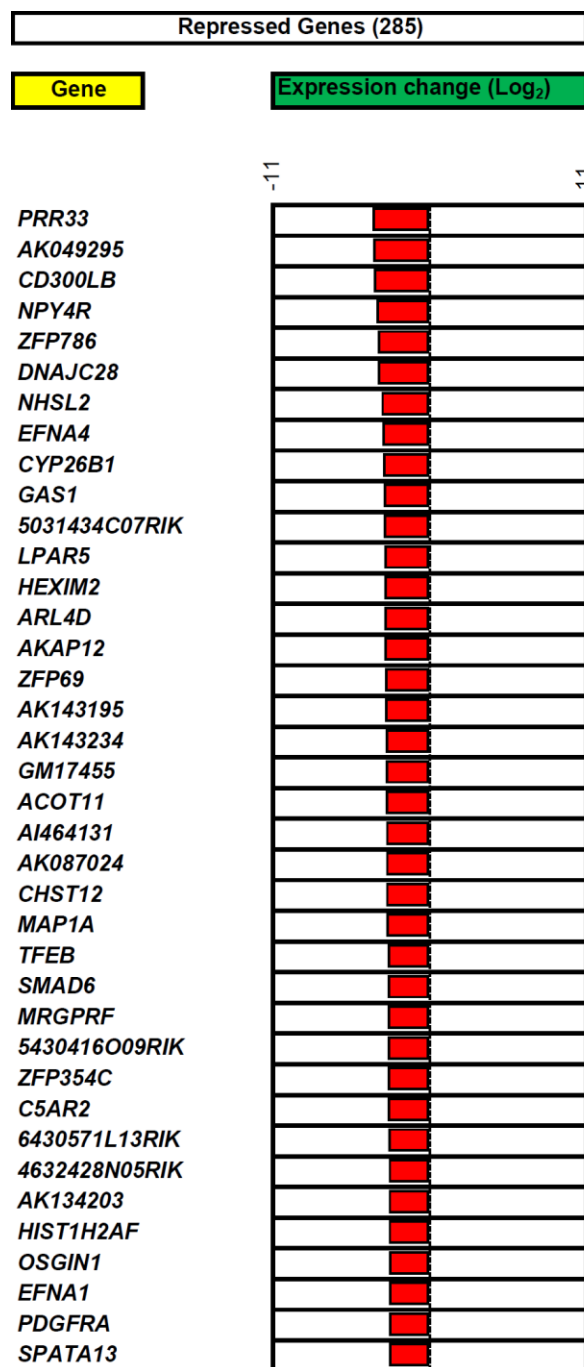

Figure C (cont'd)

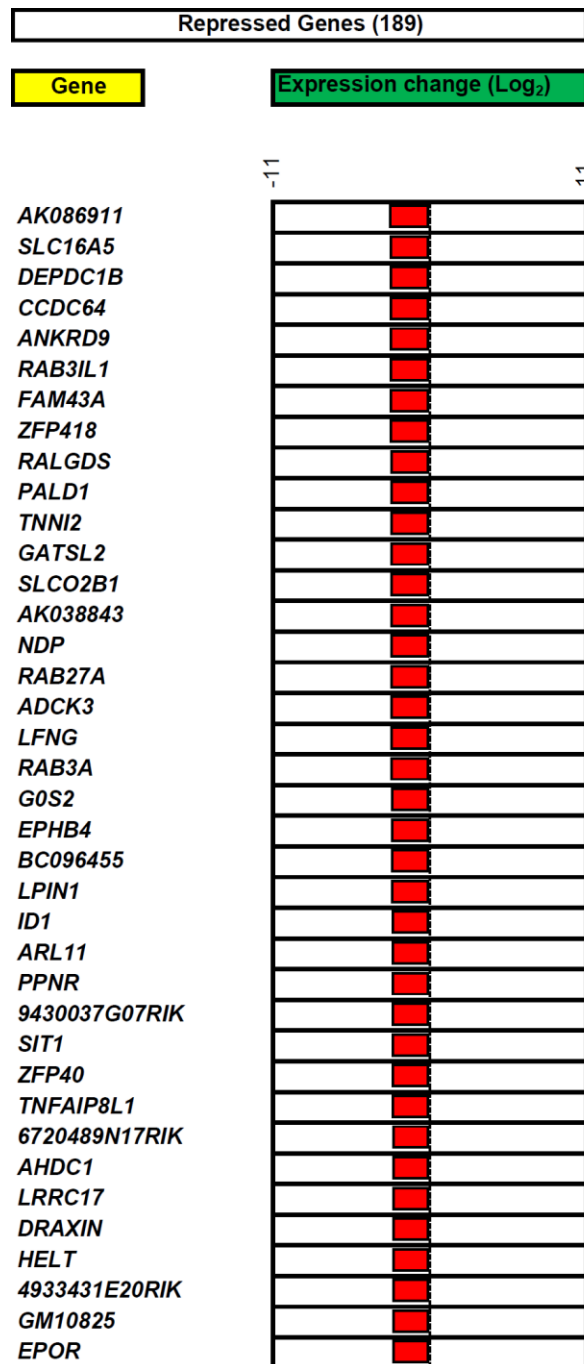

Figure C (cont'd)

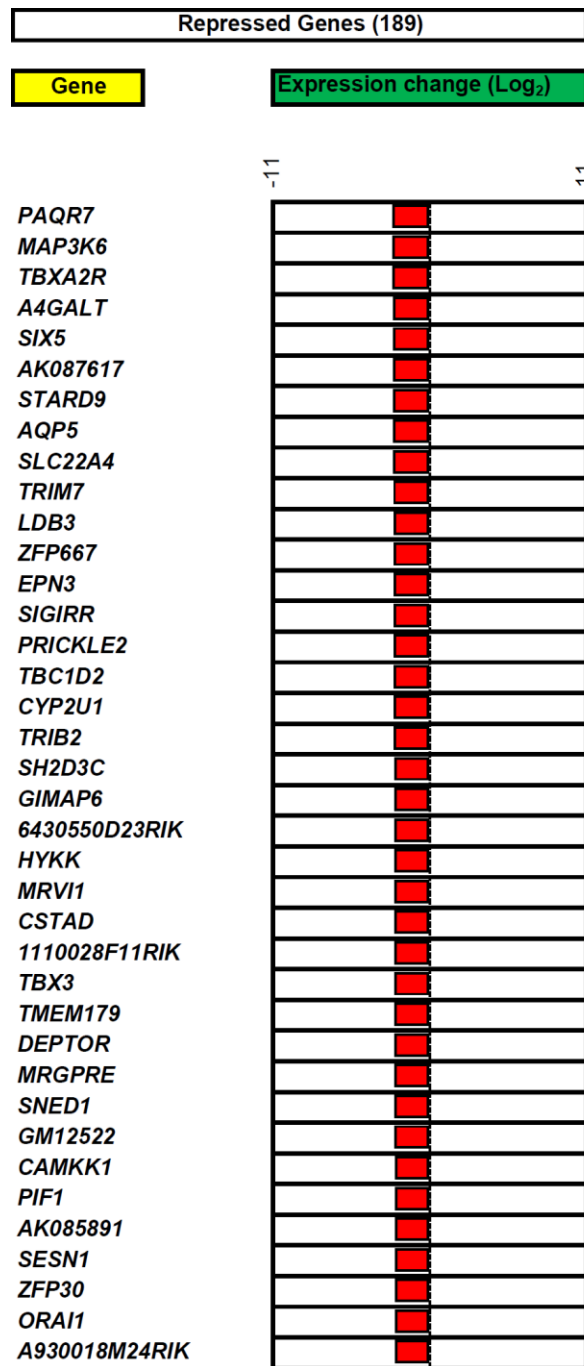

Figure C (cont'd)

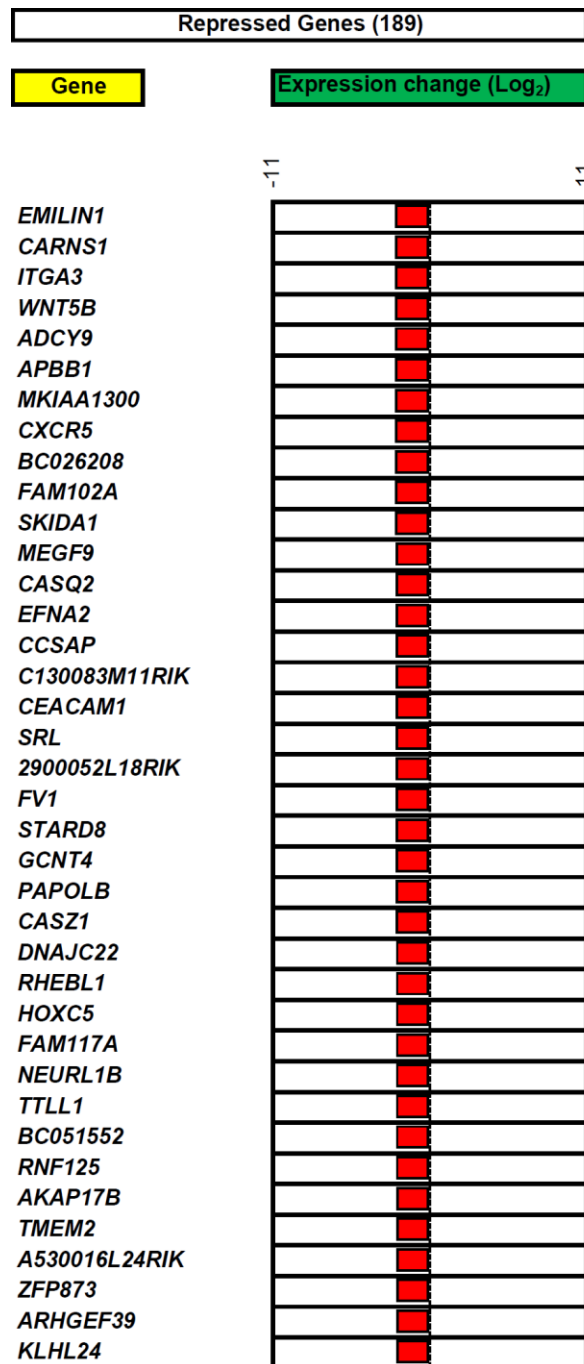

Figure C (cont'd)

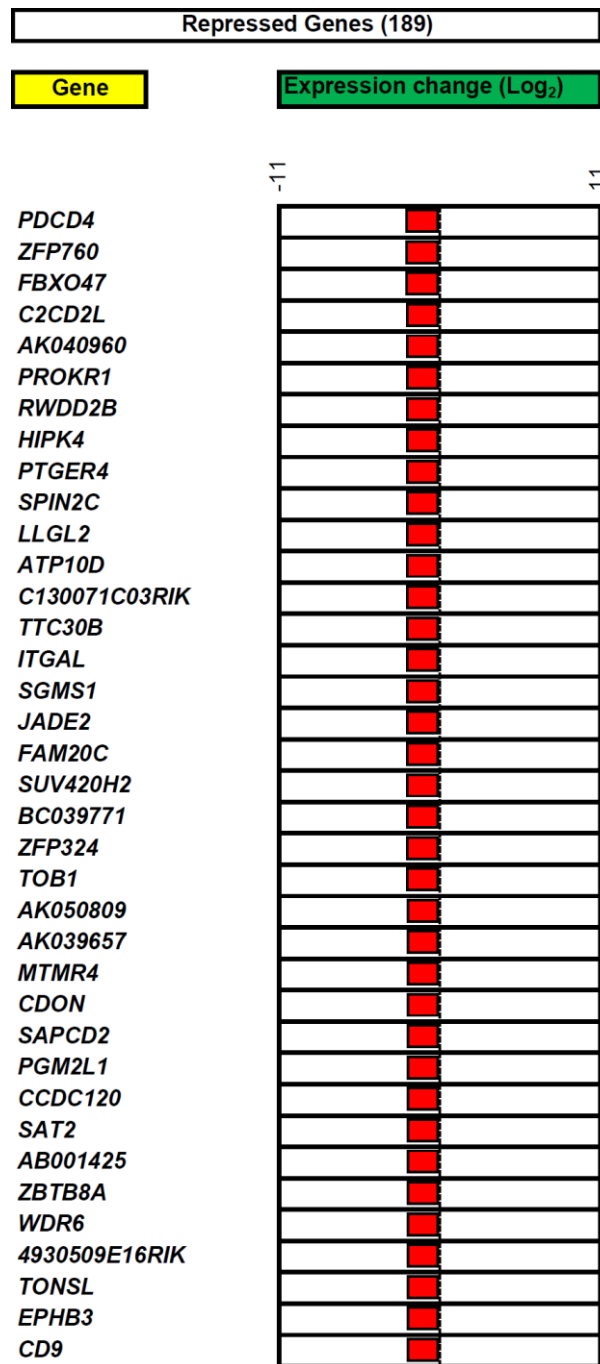

Figure C (cont'd)

Figure D. Overexpressed genes interaction network during reovirus infection.

Interaction network for the 380 cellular genes for which the expression was upregulated upon viral infection. The network was determined by uploading the genes into STRING. Solid lines: direct known interactions; dashed lines: suspected or indirect interactions.

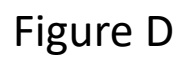

Figure E. 240 ASEs are modified during viral infection with reovirus.

Heatmap representation with a sequential color scale of the 240 ASEs that are differentially spliced upon viral infection. RNA sequencing was done in triplicate for both the uninfected (mock) and infected cells. Darker shades indicates high  $\Delta$ PSI values and lighter shades indicates low  $\Delta$ PSI values between infected and mock cells. More than one ASEs can impact the same gene.

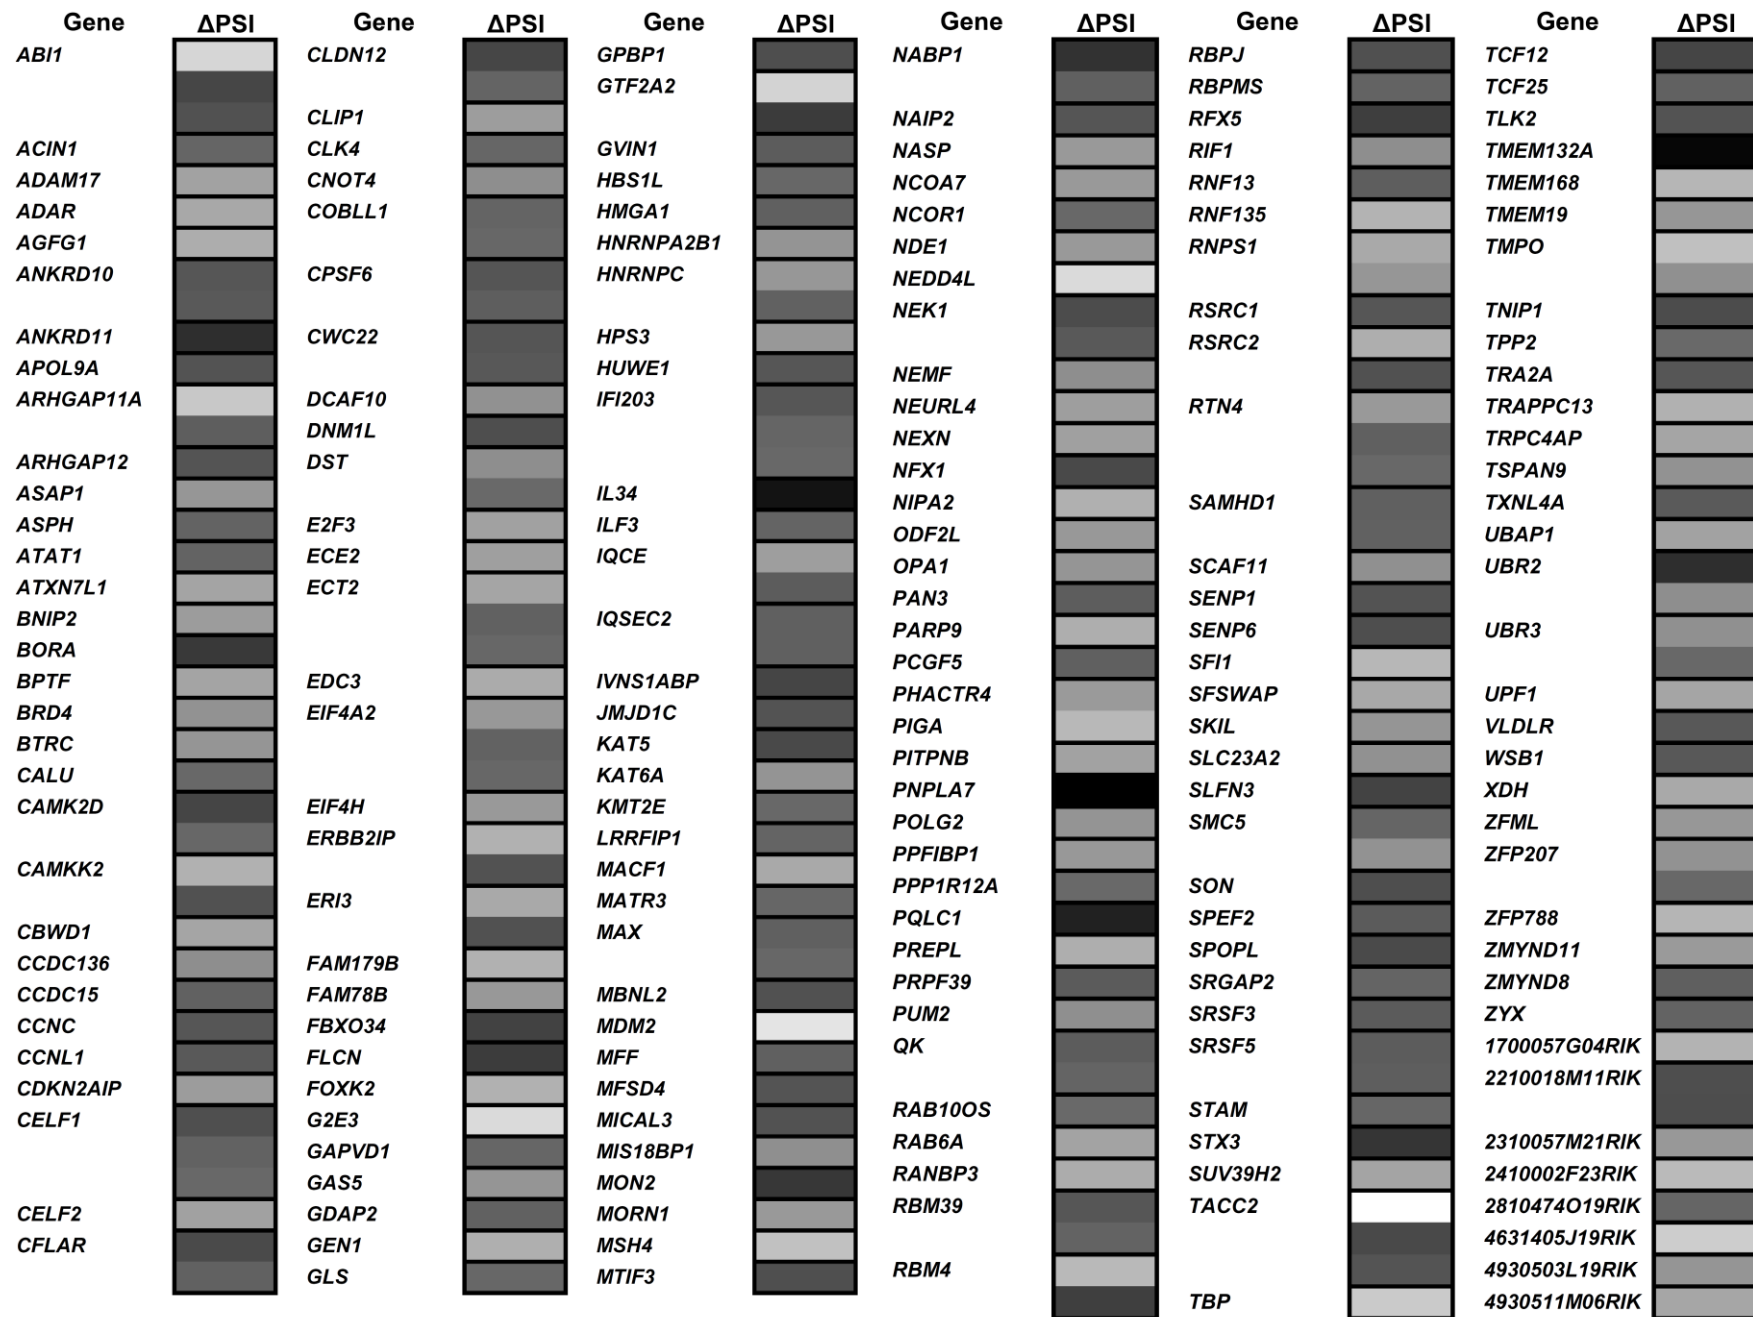

Figure E

Figure F. Profiling of the cellular alternative splicing landscape during reovirus infection.

(A) Interaction network for genes encoding the 240 differentially spliced transcripts upon viral infection. The network was determined by uploading the corresponding genes into STRING. Solid lines: direct known interactions; dashed lines: suspected or indirect interactions.

(B) Gene ontology analysis of the 240 differentially spliced transcripts upon viral infection. The corresponding genes were imported into the DAVID gene ontology suite of programs at the NIAID. Ontological functions were determined determined for biological processes using all ASEs characterized as background.

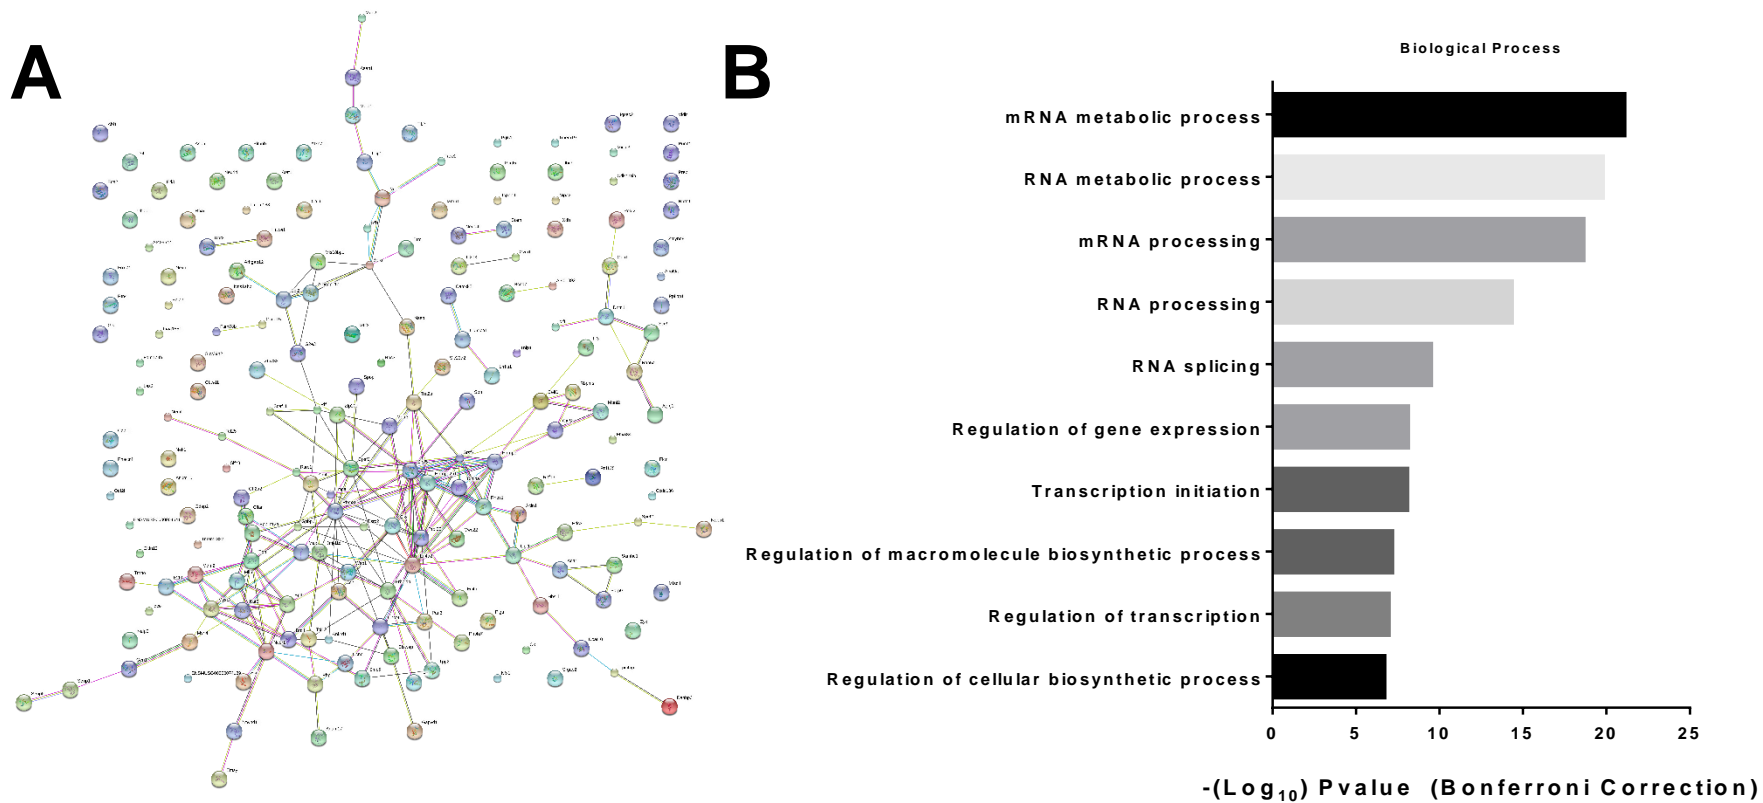

Figure F

Figure G. Additional validation of ASEs dysregulated in infected cells.

(A, C, E) Overview of two isoforms encoded by the *HNRNPA2B1*, *EIF4A2*, and *IL34* genes. Exons are depicted in red and the intervening introns are shown as thin black lines (not to scale). The primers used to detect the ASEs by RT-PCR assays are shown in gray and the sizes of the expected amplicons (162 nt and 282 nt, 112 nt and 219 nt, 256 nt and 374 nt, respectively ) are also indicated. The genomic coordinates of the two isoforms are also indicated.

(B, D, F) Cellular mRNAs isolated from both uninfected and infected cells were analyzed by RT-PCR using specific primers to detect both forms of the ASE encoded on various genes. The amplified products were analyzed by automated chip-based microcapillary electrophoresis. Capillary electrophoregrams of the PCR reactions are shown. The positions and the amplitude of the detected amplicons are highlighted by red boxes. The positions of the internal markers are also indicated.

A

Isoform NM\_016806  
NM\_016806 [1-9460]

Reactions

282: Hnrnpa2b1.e02.F1 Hnrnpa2b1.e02.R1

Isoform NM\_182650  
NM\_182650 [1-9460]

Reactions

162: Hnrnpa2b1.e02.F1 Hnrnpa2b1.e02.R1

B

## HNRNPA2B1 - Uninfected

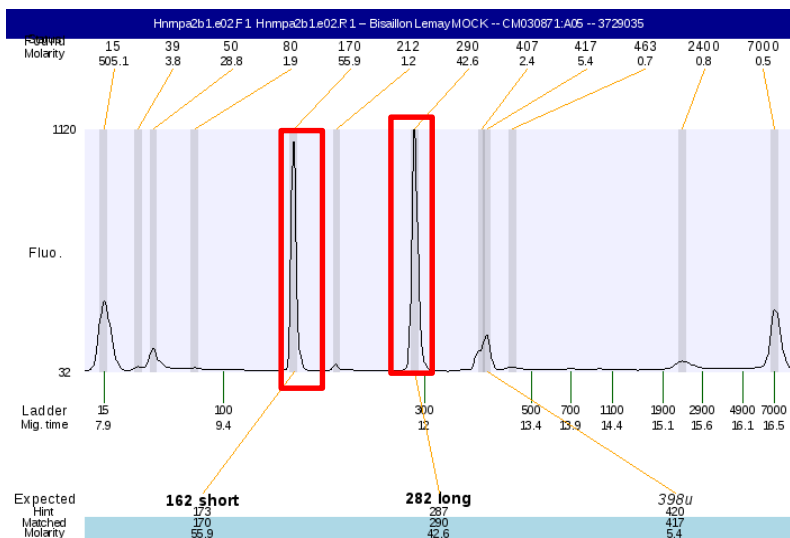

## HNRNPA2B1 - Infected

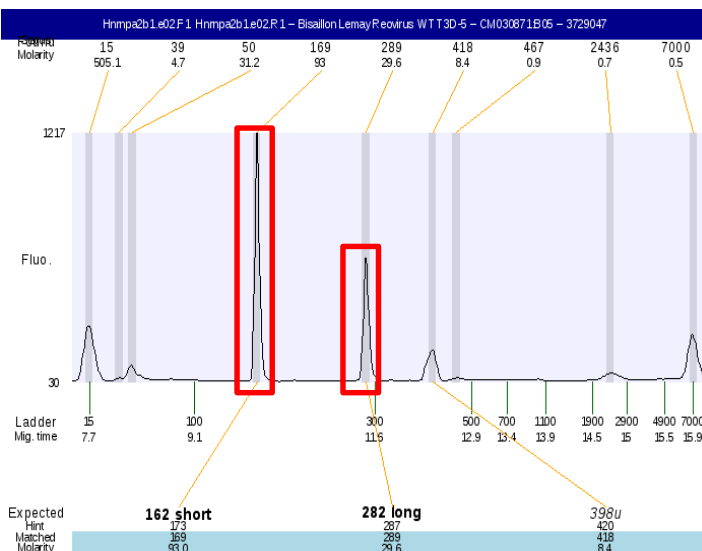

Figure G

C

Isoform NM\_013506  
NM\_013506 [1-6665]

Reactions

112: Eif4a2.e.F1 Eif4a2.e.R1

Isoform NR\_118335  
NR\_110335 [1-6665]

Reactions

219: Eif4a2.e.F1 Eif4a2.e.R1

D

EIF4A2 - Uninfected

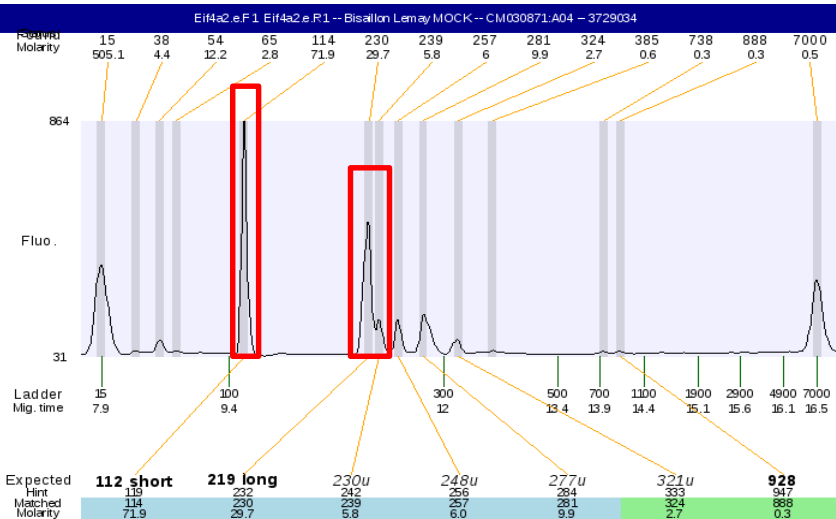

EIF4A2 – Infected

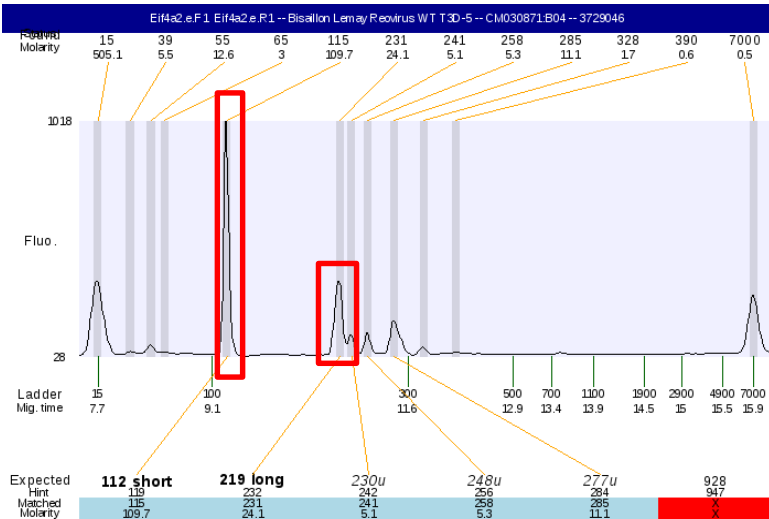

Figure G (cont'd)

# E

**Isoform NM\_001135100**  
NM\_001135100 [1-64096]

**Reactions**

256: I134.e01.F1 I134.e01.R1

**Isoform NM\_029646**  
NM\_029646 [1-64096]

**Reactions**

374: I134.e01.F1 I134.e01.R1

# F

*IL34* – Uninfected

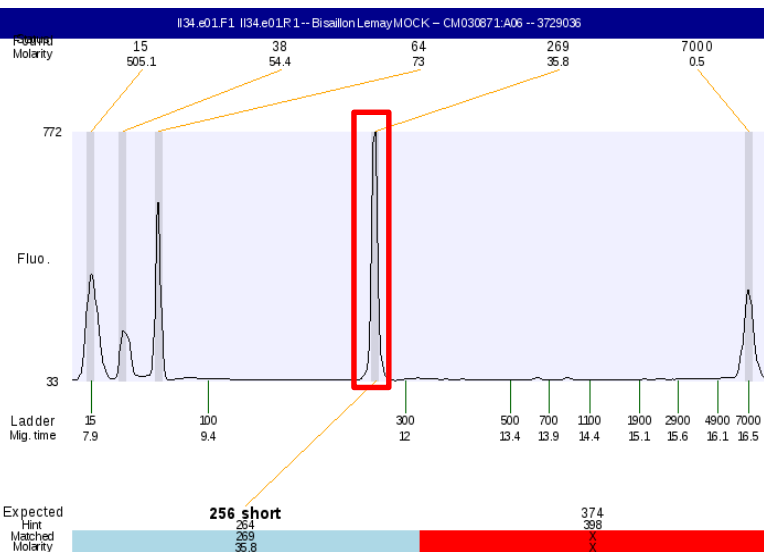

*IL34* – Infected

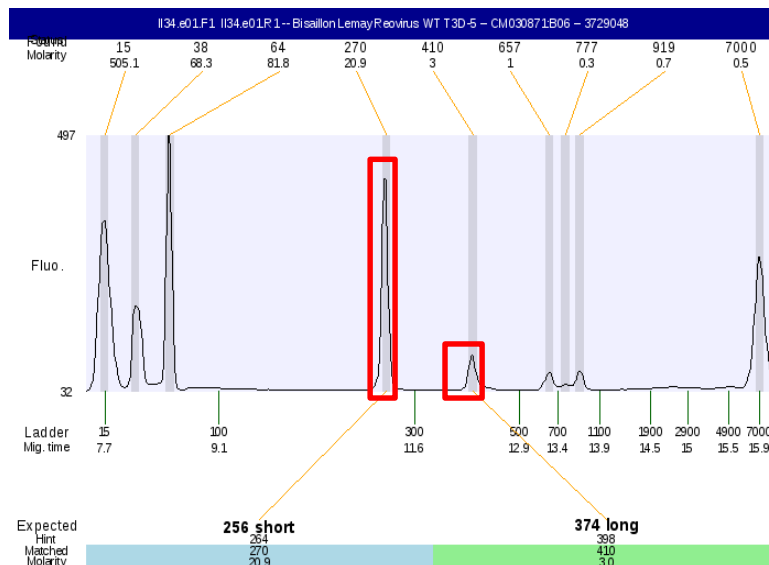

Figure G (cont'd)

Figure H. List of the differentially AEs associated with viral infection.

The list displays the 240 differentially spliced transcripts with the corresponding Delta PSI values, the associated gene expression (in  $\text{Log}_2$ ), and the associated biological processes.











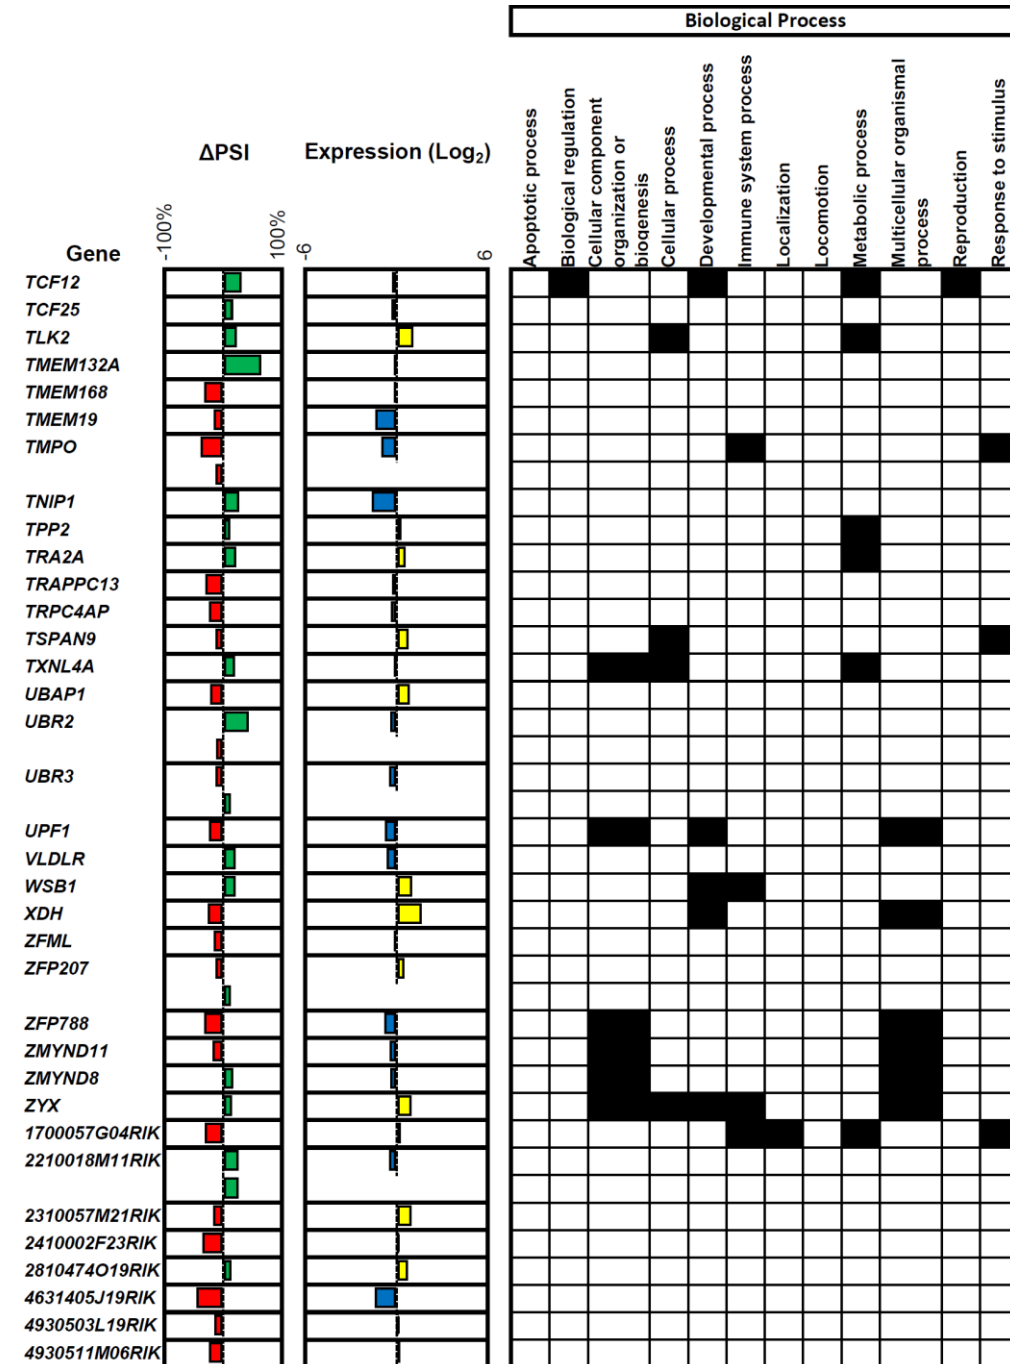

Figure H (cont'd)

Figure 1. Common ASEs modified between WT reovirus and P4L-12 mutant show a strong correlation.

Correlation between PSI values for WT and P4L-12 mutant reovirus.

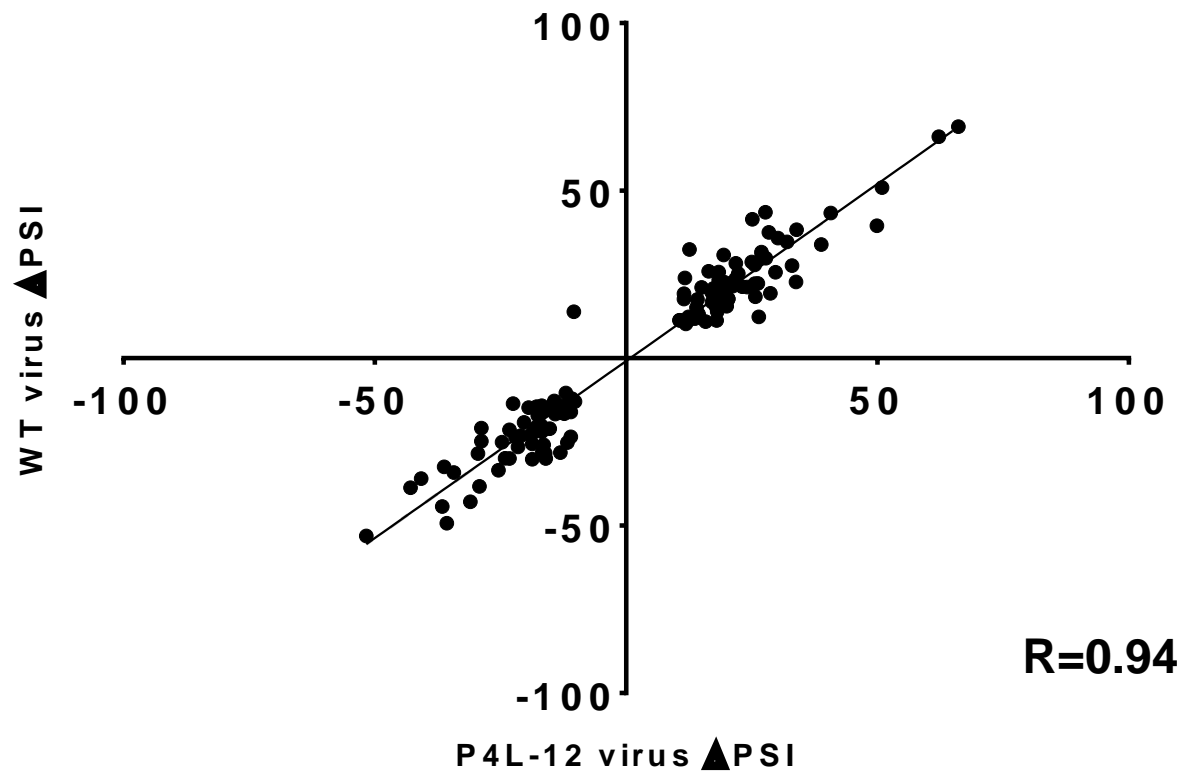

Figure I

Figure J. Analysis of the 240 differentially spliced transcripts highlights a consensus sequence.

A significant enrichment of a 41 nt motif in the vicinity of many splice regions was found in transcripts for which AS was altered upon viral infection. The motif was found in 93 of the 240 transcripts that were differentially spliced upon viral infection (e value =  $1,3e-10^{49}$ ). The differentially spliced exon and its flanking introns were used to search for this motif.

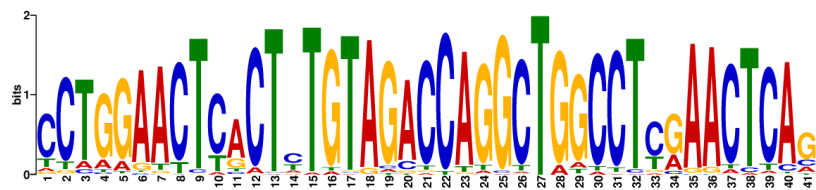

Figure J
